# Supplementary material for: Facets of shame and their impact on quality of life in patients with atopic dermatitis and psoriasis
Source: Research Square preprint supplement (doi:10.21203/rs.3.rs-5592233/v1), 2025-04-09
Supplement: Supplementary file 1 [file 68cff9c038dd2fcf2b167e99.docx]

**Tables**

**Table 1**: Sociodemographic and clinical characteristics of the study population.

|  | **Study sample** | **AD patients** | **Psoriasis patients** | **Statistics** | |
| --- | --- | --- | --- | --- | --- |
|  | (N = 413) | (N = 162) | (N = 251) | T/ χ2 | p |
| **Age** (years; M ± SD; range) | 43.0 ± 15.7  (18 – 85) | 37.2 ± 14.5  (18 – 80) | 46.7 ± 15.3  (18 – 85) | -6.28 | <.001 |
| **Sex** |  |  |  | 4.69 | .030 |
| Women | 267 (64,6%) | 115 (71.0%) | 152 (60.6%) |  |  |
| Men | 146 (35.4%) | 47 (29.0%) | 99 (39.4%) |  |  |
| **Marital status** |  |  |  | 12.63 | .002 |
| Single/ unmarried | 175 (42.7%) | 85 (52.8%) | 99 (36.1%) |  |  |
| Married/ steady partner | 199 (48.5%) | 61 (37.9%) | 138 (55.4%) |  |  |
| Separated/ widowed | 36 (8.8%) | 15 (9.3%) | 21 (8.4%) |  |  |
| **Education*** |  |  |  | 10.69 | .005 |
| Lower secondary education (level 2) | 178 (43.1%) | 54 (33.3%) | 124 (49.4%) |  |  |
| Upper secondary education (level 3) | 222 (53.8%) | 103 (63.6%) | 119 (47.4%) |  |  |
| Other# | 13 (3.1%) | 5 (3.1%) | 8 (3.2%) |  |  |
| **Disease duration** (years; M±SD) | 24.2 ± 16.3 | 27.0 ± 14.8 | 22.3 ± 17.0 | 3.00 | .003 |
| **Disease severity** |  |  |  |  |  |
| POEM, 0-28 (M ± SD) |  | 13.4 ± 6.9 |  |  |  |
| PSSD, 0-100 (M ± SD) |  |  | 25.6 ± 23.6 |  |  |
| PSSD symptoms |  |  | 12.7 ± 11.9 |  |  |
| PSSD signs |  |  | 20.4 ± 15.3 |  |  |
| **DLQI**, 0-30 (M ± SD) | 7.35 ± 6.61 | 8.59 ± 6.70 | 6.55 ± 6.44 | 3.09 | .002 |
| **DLQI(-item 2)** (M ± SD) | 6.39 ± 5.86 | 7.45 ± 5.93 | 5.70 ± 5.73 | 2.99 | .003 |

AD, atopic dermatitis; M, mean; SD, standard deviation; T, t-test statistic; χ2, chi-square statistic; p, p-value; POEM, Patient‐Oriented Eczema Measure; PSSD, Psoriasis Symptoms and Signs Diary; DLQI, Dermatology Life Quality Index; DLQI(-item 2), Dermatology Life Quality Index without its Item 2

* according to the International Standard Classification of Education (ISCE); corresponding to the German school system, education was categorized into ≤ 10 years which aligns with level 2 of the ISCE, and ≥ 11 years (level 3)

# this category includes ‘still in school’, ‘no graduation’, ‘ special school’, and ‘other’

**Table 2**: Psychosocial characteristics in patients with chronic inflammatory skin diseases.

|  | **Study sample** | **AD patients** | **Psoriasis patients** |  |  |  |
| --- | --- | --- | --- | --- | --- | --- |
|  | (N = 413) | (N = 162) | (N = 251) | T | p | d |
| **SSS-24**, 24-120 | 66.1 ± 18.0 | 67.9 ± 17.2 | 65.0 ± 18.4 | 1.68 | .093 | .17 |
| **SHAME**, 0-5 | 2.14 ± 0.77 | 2.18 ± 0.76 | 2.11 ± 0.77 | 0.87 | .385 | .09 |
| Bodily shame, 0-5 | 2.09 ± 1.12 | 2.17 ± 1.11 | 2.04 ± 1.13 | 1.17 | .241 | .12 |
| Cognitive shame, 0-5 | 3.41 ± 1.03 | 3.48 ± 1.01 | 3.37 ± 1.04 | 1.03 | .304 | .10 |
| Existential shame, 0-5 | 0.91 ± 0.77 | 0.88 ± 0.71 | 0.92 ± 0.81 | -0.51 | .609 | -.05 |
| **PHQ-4**, 0-6 | 4.43 ± 3.24 | 4.73 ± 3.26 | 4.23 ± 3.21 | 1.56 | .120 | .16 |
| PHQ-2, 0-6 | 2.11 ± 1.67 | 2.29 ± 1.68 | 2.00 ± 1.66 | 1.75 | .081 | .18 |
| GAD-2, 0-6 | 2.31 ± 1.83 | 2.44 ± 1.87 | 2.23 ± 1.80 | 1.16 | .247 | .12 |

AD, atopic dermatitis; T, t-test statistic; p, p-value; d, Cohen’s d effect size; SSS-24, Skin Shame Scale; SHAME, Shame Assessment for Multifarious Expressions of Shame; PHQ-4, Patient Health Questionnaire-4; PHQ-2, depression items of the Patient Health Questionnaire-4; GAD-2, anxiety items of the Patient Health Questionnaire-4

**Table 3:** Intercorrelations (Pearson r) between the variables of interest.

|  | **Age** | **Sex** | **SSS-24** | **SHAME** | **Bodily** | **Cognitive** | **Existential** | **PHQ-2** | **GAD-2** |
| --- | --- | --- | --- | --- | --- | --- | --- | --- | --- |
| **Sex** | .18*** | - |  |  |  |  |  |  |  |
| **SSS-24** | -.14** | -.30*** | - |  |  |  |  |  |  |
| **SHAME** | -.18*** | -.31*** | .41*** | - |  |  |  |  |  |
| **Bodily** | -.22*** | -.39** | .41*** | .89*** | - |  |  |  |  |
| **Cognitive** | -.14** | -.26*** | .23*** | .79*** | .57*** | - |  |  |  |
| **Existential** | -.03 | -.02 | .31*** | .63*** | .44*** | .18*** | - |  |  |
| **PHQ-2** | -.15*** | -.20*** | .56*** | .35*** | .30*** | .22*** | .31*** | - |  |
| **GAD-2** | -.17*** | -.28*** | .53*** | .42*** | .37*** | .25*** | .39*** | .71*** | - |
| **DLQI** | -.12** | -.24*** | .70*** | .25*** | .23*** | .13** | .23*** | .52*** | .48*** |
| **DLQI(-item 2)** | -.11* | -.23*** | .68*** | .23*** | .21** | .12* | .22*** | .51*** | .47*** |

SSS-24, Skin Shame Scale; SHAME, Shame Assessment for Multifarious Expressions of Shame; PHQ-2, depression items of the Patient Health Questionnaire-4; GAD-2, anxiety items of the Patient Health Questionnaire-4; DLQI, Dermatology Life Quality Index; DLQI(-item 2), Dermatology Life Quality Index without its Item 2

*p < 0.05, **p < 0.01, ***p < 0.001

**Table 4:** Associations between quality of life (as measured by the DLQI [dependent variable]) and sociodemographic characteristics, skin disease-related features, depression, anxiety, and shame dimensions (hierarchical linear regression).

|  | **AD patients** | | |  | **Psoriasis patients** | | |
| --- | --- | --- | --- | --- | --- | --- | --- |
|  | **Adj. R2** | **ΔR2** | **p** |  | **Adj. R2** | **ΔR2** | **p** |
| **Block 1** | .53 | .54 | <.001 |  | .52 | .53 | <.001 |
| **Block 2** | .59 | .07 | <.001 |  | .57 | .04 | <.001 |
| **Block 3** | .64 | .05 | <.001 |  | .66 | .10 | <.001 |
| **Variables** | **B ± SE** | **β** | **p** |  | **B ± SE** | **Β** | **p** |
| **Disease severity**# | .44 ± .06 | .46 | <.001 |  | .12 ± .01 | .45 | <.001 |
| **Disease duration** | -.04 ± .02 | -.08 | .136 |  | -.01 ± .02 | -.04 | .412 |
| **Age** | .00 ± .03 | .01 | .864 |  | .01 ± .02 | .03 | .587 |
| **Sex** | -.33 ± .79 | -.02 | .674 |  | -.70 ± .56 | -.05 | .219 |
| **Depression** (PHQ-2) | .17 ± .28 | .05 | .541 |  | .42 ± .22 | .11 | .057 |
| **Anxiety** (GAD-2) | .40 ± .26 | .11 | .129 |  | -.13 ± .21 | -.04 | .526 |
| **Skin Shame** (SSS-24) | .13 ± .03 | .34 | <.001 |  | .15 ± .02 | .43 | <.001 |
| **Bodily Shame** | -.12 ± .43 | -.02 | .776 |  | -.65 ± .31 | -.11 | .036 |
| **Cognitive Shame** | .01 ± .41 | .00 | .977 |  | .17 ± .28 | .03 | .552 |
| **Existential Shame** | -.02 ± .53 | -.00 | .973 |  | .57 ± .37 | .07 | .112 |

Adj. R2, explained variance; ΔR2, increase in explained variance; B ± SE, unstandardized regression coefficient with standard error; β, standardized regression coefficient

Block 1: Inclusion of disease severity, disease duration, age, and sex

Block 2: Additional inclusion of depression (PHQ-2) and anxiety (GAD-2)

Block 3: Additional inclusion of skin shame (SSS-24) and other facets of shame (SHAME subscales)

# For AD patients, the POEM was used; among psoriasis patients, the PSSD was applied
